# Supplementary material for: Conventional and microwave assisted hydrothermal syntheses of 11 Å tobermorite
Source: Royal Society of Chemistry journal article supplement (doi:10.1039/c3ta11036b), 2013-01-01
Supplement: c3ta11036b.pdf [file c3ta11036b.pdf]

## Supplementary Information

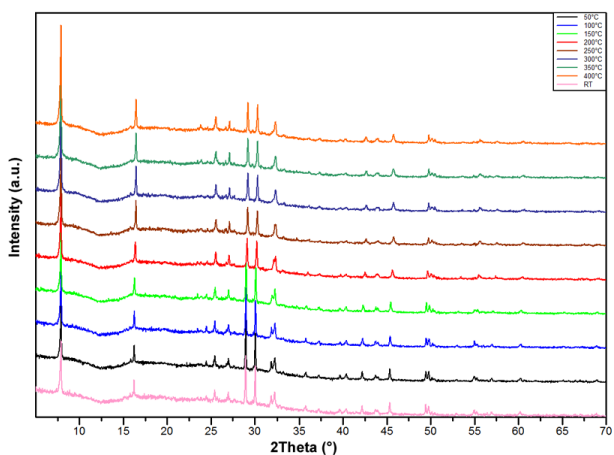

**Fig. A:** XRD patterns of sample b-2 recorded from room temperature to 400 °C in 50 ° steps.

5

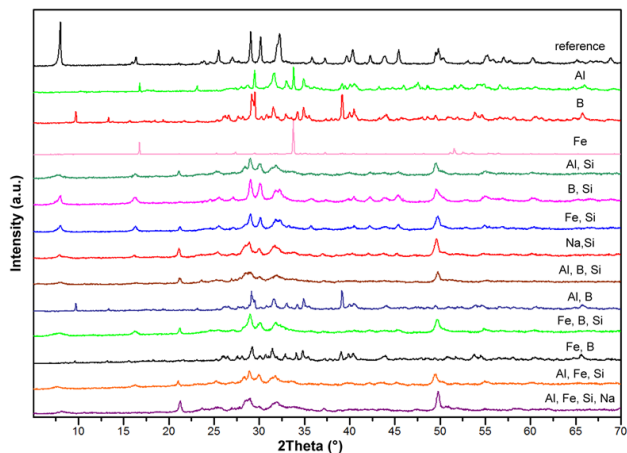

**Fig. B:** XRD patterns of samples from conventional hydrothermal synthesis with addition of  $B_2O_3$ ,  $Na_2O$ ,  $Al_2O_3$ ,  $SiO_2$  and  $Fe_2O_3$  according to the composition of borosilicate glass.

10

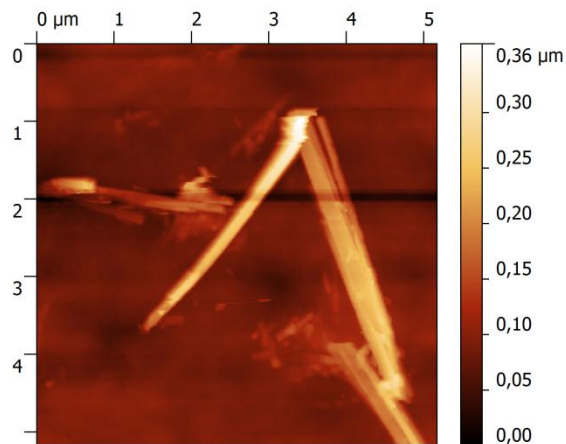

**Fig. C.** Topographical AFM image of microwave synthesized tobermorite; sample: q-3-MW.

15

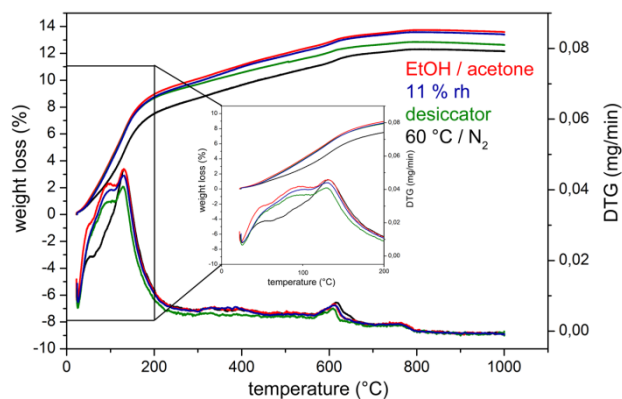

**Fig. D:** TGA data of sample q-3-MW dried using four different methods: red: stirred in dry EtOH for 30 mins and washed with dry acetone under suction; blue: stored at 11 % rh (saturated LiCl solution) for 3 d; green: dried in a desiccator under vacuum as described in the experimental part; dried at 60 °C under  $N_2$  for 3d.
